# Supplementary material for: Grb2 Is Regulated by Foxd3 and Has Roles in Preventing Accumulation and Aggregation of Mutant Huntingtin
Source: PubMed Central journal article supplement (PMC3792889; doi:10.1371/journal.pone.0076792), 2013-10-08
Supplement: pone.0076792.s002.pdf [file pone.0076792.s002.pdf]

## **SUPPLEMENTARY MATERIALS :TABLES AND FIGURES**

### **Supplementary Table S1**

Table showing primer sequences used for Realtime PCR experiments and molecular cloning

| <b>Primer Name</b> | <b>Sequence</b>                                 |
|--------------------|-------------------------------------------------|
| Grb2_ups_For       | 5'-CCG CTC GAG TCT TCT GCT GCT TCT CTC GAT-3'   |
| Grb2_ups_Rev       | 5'-CCC AAG CTT TCA CGT CCT TTC TAC CAA AAC A-3' |
| Grb2_RT_1          | 5'-AAA TGC TCA GCA AAC AGC GG-3'                |
| Grb2_RT_2          | 5'-TGA AGT GCT GCA CAT CAT TTC C-3'             |
| FOXD3_RT_1         | 5'- TCT GCG AGT TCA TCA GCA ACG-3'              |
| FOXD3_RT_2         | 5'- TTG ACG AAG CAG TCG TTG AGC-3'              |
| Beta actin_RT-1    | 5'-TCC TGT GGC ATC CAG GAA ACT-3'               |
| Beta actin_RT_2    | 5'- GAA GCA TTT GCG GTG GAC-3'                  |

**Supplementary Table S2****List of Transcription Factors From MATCH output with known expressions in HD**

| <b>Transcription Factor</b> | <b>Binding site position</b> | <b>Core Match</b> | <b>Matrix Match</b> | <b>Expression in HD</b> | <b>Regulation</b>     |
|-----------------------------|------------------------------|-------------------|---------------------|-------------------------|-----------------------|
| HNF-3beta                   | 225                          | 1.000             | 0.975               | Upregulated             | Positive/<br>negative |
| FOXD3                       | 226                          | 1.000             | 0.963               | Upregulated             | Positive/<br>negative |
| Pax-6                       | 2908<br>9271                 | 0.792<br>1.000    | 0.804<br>0.833      | Up/downregulated        | negative              |
| Pax-4                       | 4676<br>8702                 | 0.979<br>1.000    | 0.836<br>0.843      | downregulated           | negative              |
| Elk-1                       | 5641                         | 1.000             | 0.922               | downregulated           | positive              |
| Evi-1                       | 7620                         | 0.842             | 0.862               | upregulated             | negative              |

**Supplimentary Table S3****List of Transcription Factors with unknown expressions in HD**

| <b>Transcription Factor</b> | <b>Binding site position</b> | <b>Core Match</b> | <b>Matrix Match</b> |
|-----------------------------|------------------------------|-------------------|---------------------|
| v-Maf                       | 1152                         | 1.000             | 0.921               |
| v-Myb                       | 1682                         | 1.000             | 0.966               |
|                             | 1802                         | 1.000             | 0.971               |
|                             | 7269                         | 1.000             | 0.971               |
| HNF-1                       | 2734                         | 0.794             | 0.844               |
| CCAAT box                   | 2752                         | 1.000             | 0.981               |
| Oct-1                       | 2867                         | 1.000             | 0.940               |
|                             | 4655                         | 0.909             | 0.893               |
|                             | 8435                         | 0.992             | 0.990               |
| NF-Y                        | 2988                         | 1.000             | 0.992               |
| AP-1                        | 3052                         | 1.000             | 0.991               |
|                             | 4689                         | 1.000             | 0.982               |
| HNF-1                       | 6364                         | 0.942             | 0.868               |
| COMP-1                      | 5825                         | 1.000             | 0.814               |
|                             | 6942                         | 0.822             | 0.825               |
| GATA-1                      | 7566                         | 0.993             | 0.991               |
| Hand1                       | 7799                         | 1.000             | 0.961               |
| USF                         | 8117                         | 1.000             | 1.000               |

**Reference for Table S2:**

[1] Hodges, A., Strand, A. D., Aragaki, A. K., Kuhn, A., Sengstag, T., Hughes, G., Elliston, L. A., Hartog, C., Goldstein, D. R., Thu, D., Hollingsworth, Z. R., Collin, F., Synek, B., Holmans, P. A., Young, A. B., Wexler, N. S., Delorenzi, M., Kooperberg, C., Augood, S. J., Faull, R. L., Olson, J. M., Jones, L., and Luthi-Carter, R. (2006) *Hum Mol Genet* **15**, 965-977

[2] Lee, J. M., Ivanova, E. V., Seong, I. S., Cashorali, T., Kohane, I., Gusella, J. F., and

MacDonald, M. E. (2007) *PLoS Genet* **3**, e135

[3] Gene expression atlas <http://www.ebi.ac.uk/gxa/>

[4] Transfac Match <http://www.gene-regulation.com/pub/programs.html>

### **Supplementary Figure legends:**

**Fig S1:** Representative confocal image of neuro2a cell, co-transfected with Grb2 dsred and 145QHttexon1 and immunostained with Rab7 antibody and nuclear stained with DAPI.

**Fig S2:** Bar diagram of the mean optical densities of bands obtained in three independent filter retardation assay (n=3) with neuro2A cells transfected with Grb2-Dsred; 145QHttex1 GFP and Grb2-Dsred; 145Q httex1 GFP; and 145Q Httex1 and Dsred. In all cases total input loads were 20µg and 40µg.

**Fig S3:** MTT assay result of three independent (n=3) experiments of STHdhQ7/7 and STHdhQ111/111 and STHdhQ111/111 Grb2 si cells and transfected with Grb2-dsred and Dsred respectively.

**Fig S4:** Representative confocal images showing endogenous distribution of Htt, Grb2 and LC3 in STHdhQ7/7 and STHdhQ111/111 cells.

**Fig S5:** A. ICQ analysis of images in B (n=20) B. Pearson's correlation coefficient of images in B (n=20) of Fig.6.

**Fig S6:** E. Representative confocal images of endogenous Htt expression in STHdhQ7/7 and STHdhQ111/111 cells transfected with DsredC1 empty vector and Grb2 dsred. F. Endogenous Htt expression in STHdhQ111/111 Grb2 si cells , STHdhQ111/111Grb2 si cells transfected with Grb2 dsred and Dsred C1 vector.

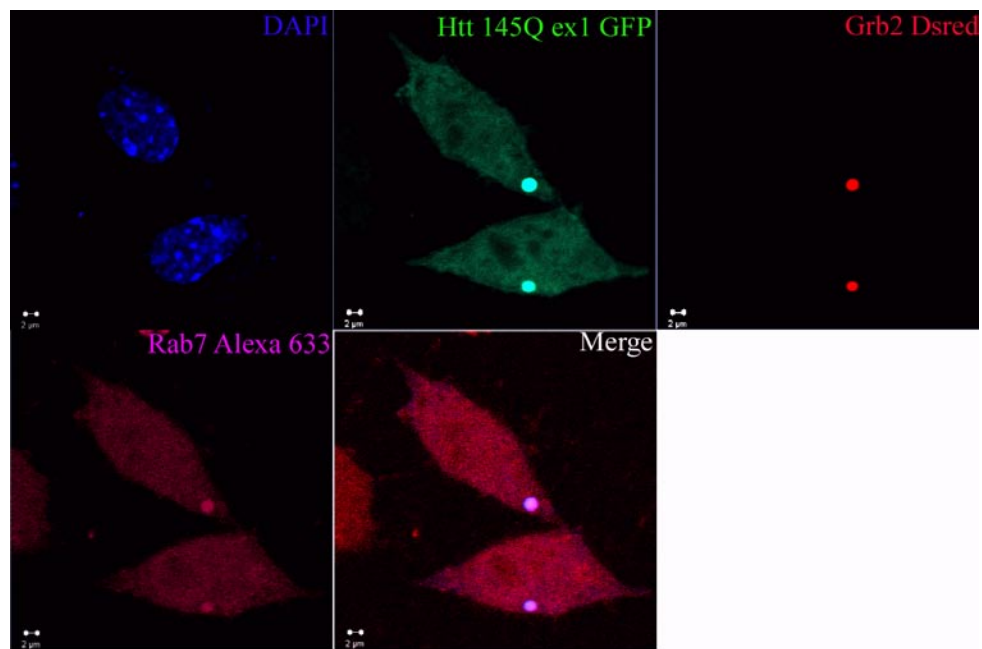

Supplementary Figure S1

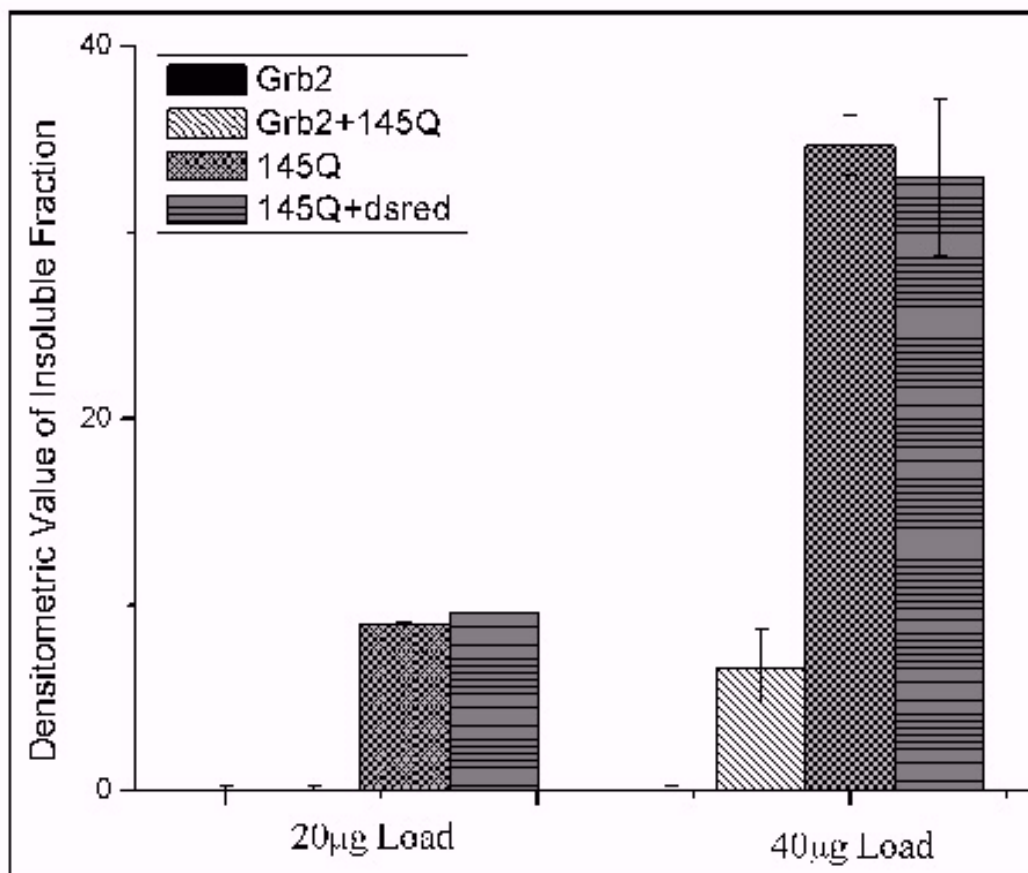

Supplementary Figure S2

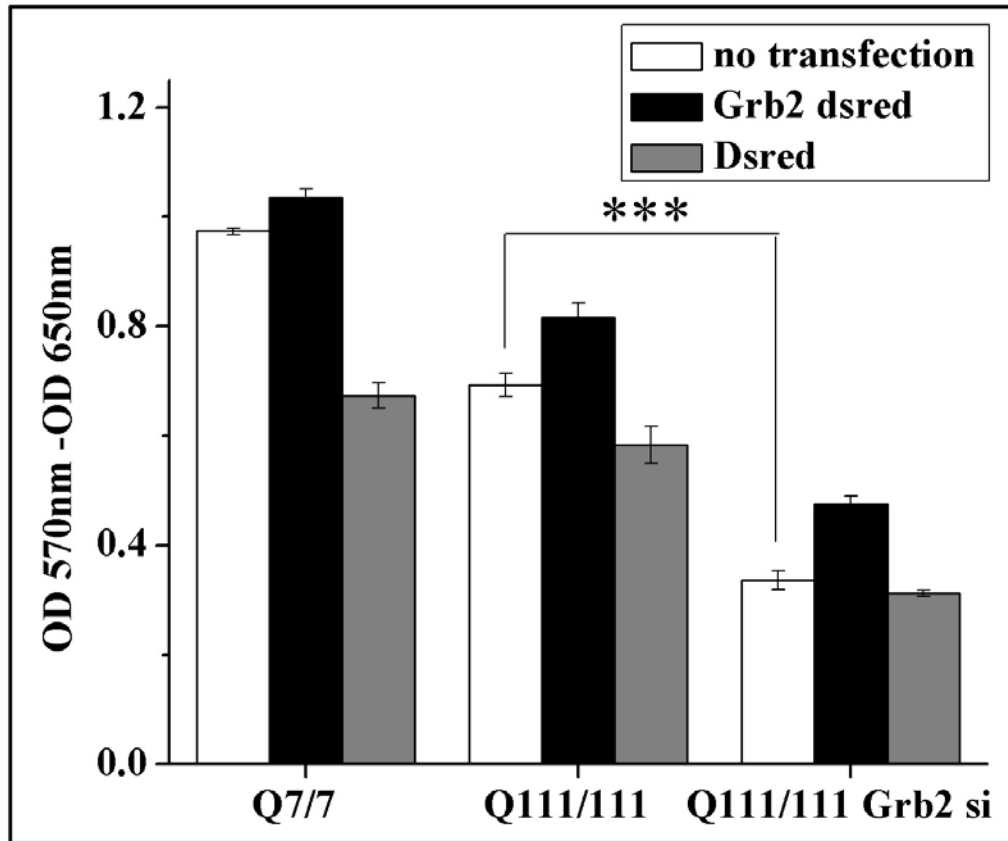

Supplementary Figure S3

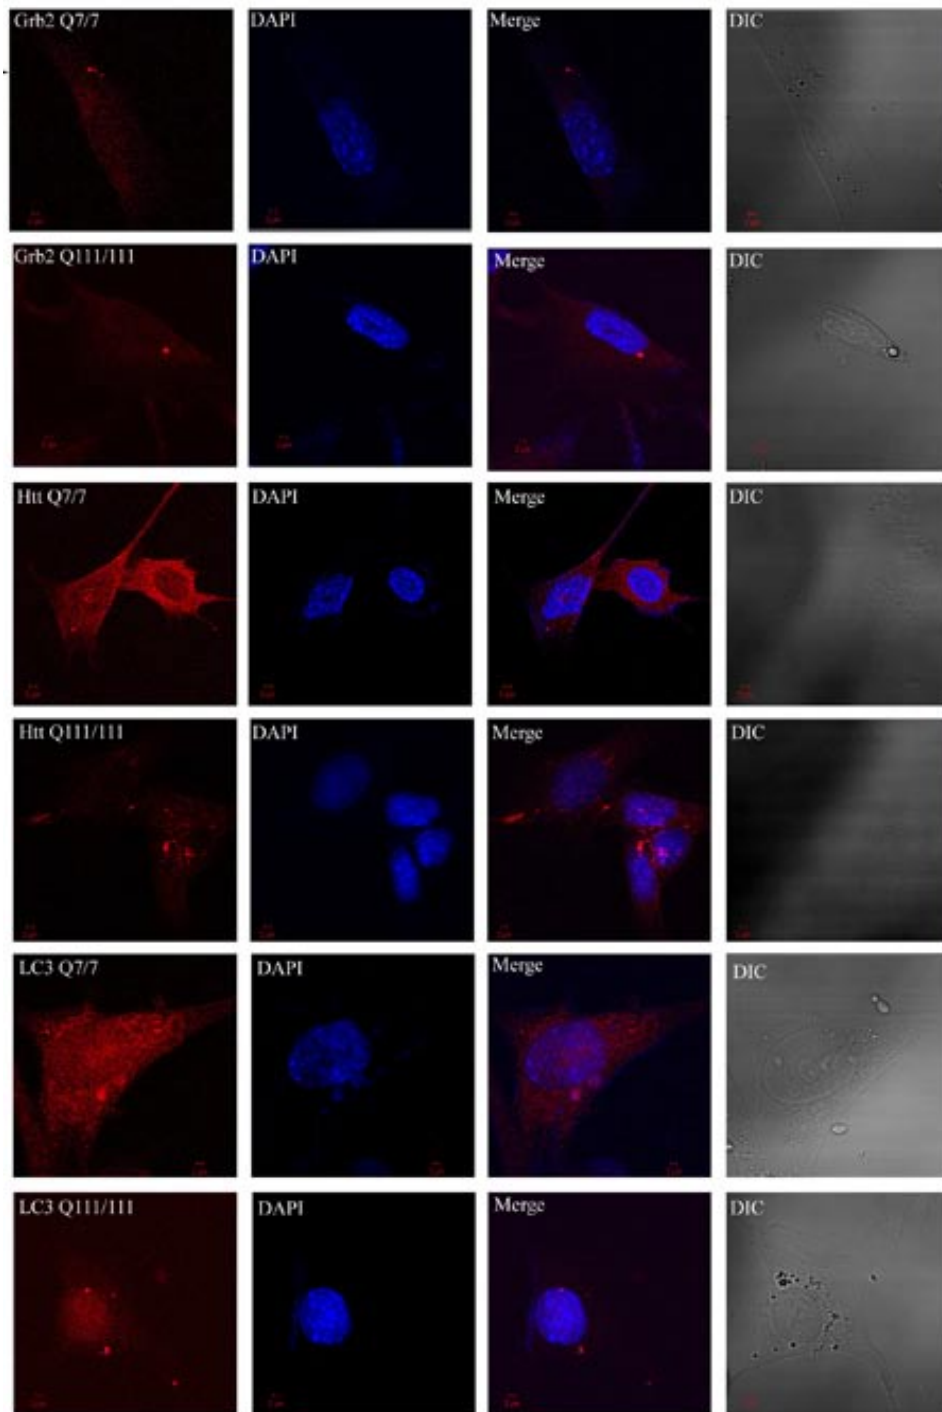

Supplementary Figure S4



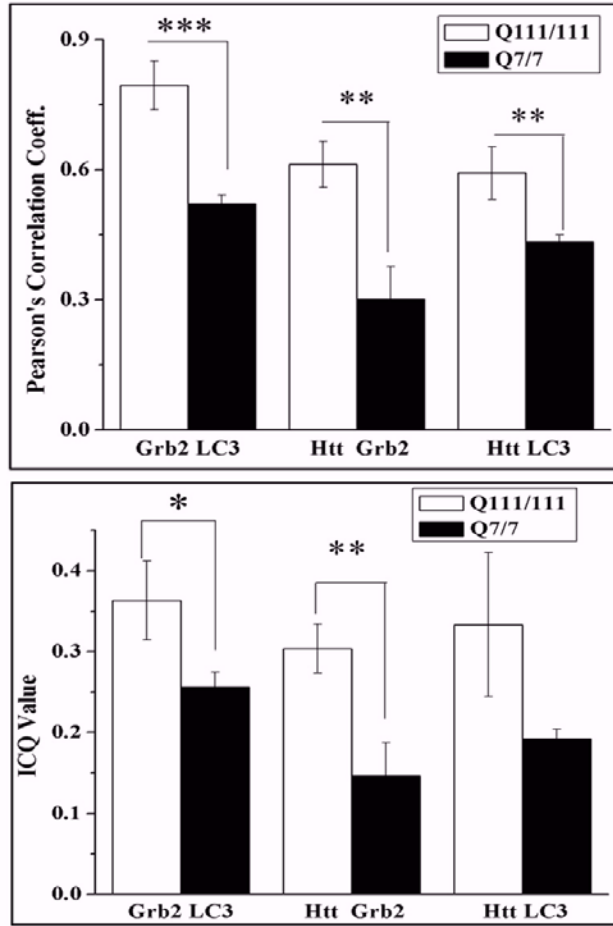

Supplementary Figure S5

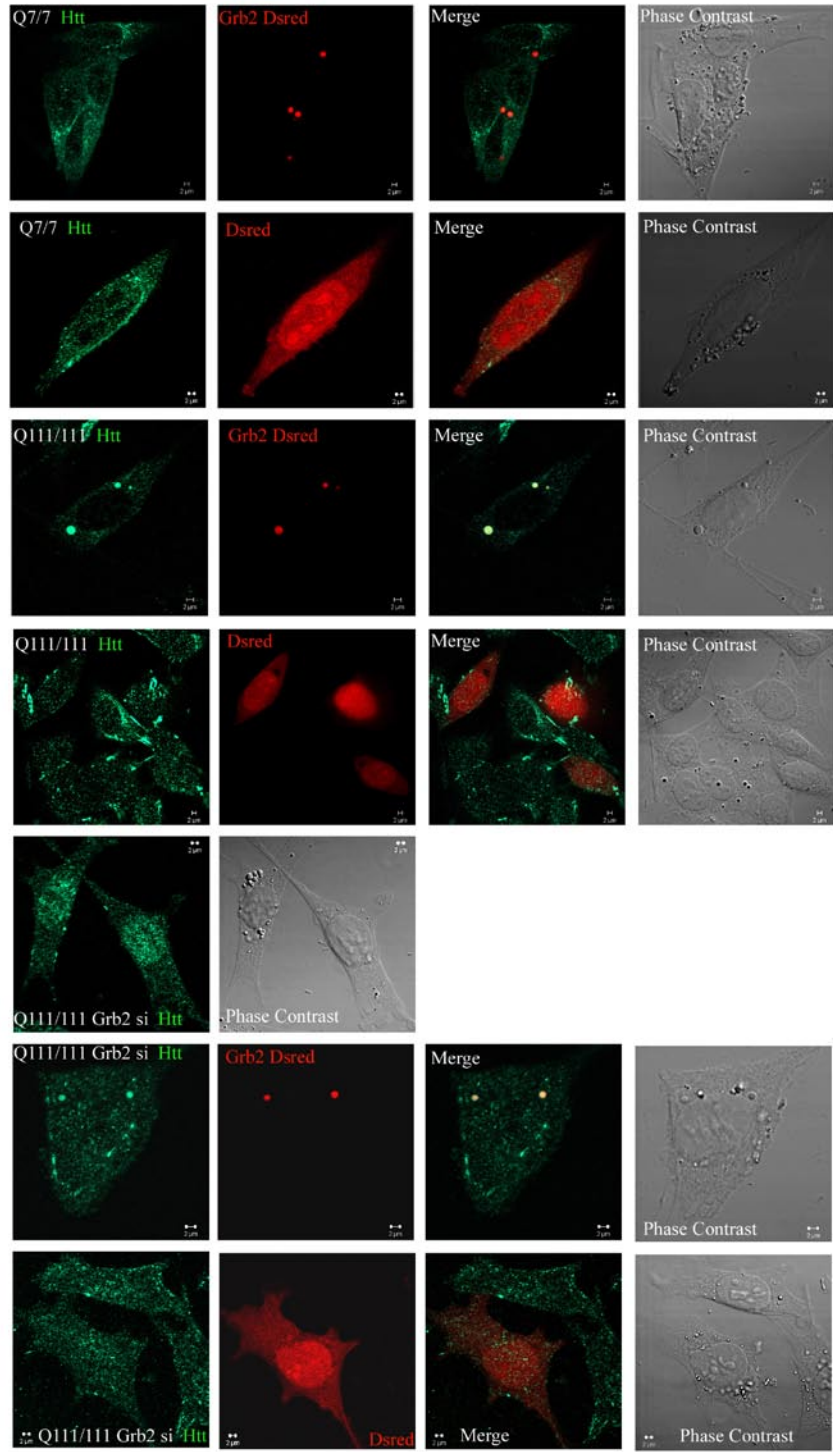

Supplementary Figure S6
